# Supplementary material for: Anti-Tumor Activity and Mechanism of Silibinin Based on Network Pharmacology and Experimental Verification
Source: MDPI journal article supplement (doi:10.3390/molecules29081901), 2024-04-22
Supplement: s1 [file s1]

# **Anti-Tumor Activity and Mechanism of Silibinin Based on Network Pharmacology and Experimental Verification**

Peihai Li <sup>1,†</sup>, Dexu Wang <sup>1,†</sup>, Xueliang Yang <sup>1</sup>, Changyu Liu <sup>1</sup>, Xiaobin Li <sup>1</sup>, Xuanming Zhang <sup>1</sup>, Kechun Liu <sup>1</sup>, Yun Zhang <sup>1</sup>, Mengqi Zhang <sup>2,\*</sup>, Changyun Wang <sup>3,\*</sup> and Rongchun Wang <sup>1,\*</sup>

<sup>1</sup> Engineering Research Center of Zebrafish Models for Human Diseases and Drug Screening of Shandong Province, Biology Institute, Qilu University of Technology (Shandong Academy of Sciences), Jinan 250103, China; liph@sdas.org (P.L.); dexuwangbio@163.com (D.W.)

<sup>2</sup> Key Laboratory of Novel Food Resources Processing, Ministry of Agriculture and Rural Affairs/Key Laboratory of Agro-Products Processing Technology of Shandong Province, Institute of Agro-Food Science and Technology, Shandong Academy of Agricultural Sciences, Jinan 250100, China

<sup>3</sup> Key Laboratory of Marine Drugs, The Ministry of Education of China, School of Medicine and Pharmacy, Ocean University of China, Qingdao 266003, China

\* Correspondence: mengqi139@126.com (M.Z.); changyun@ouc.edu.cn (C.W.); lwangrongchun@163.com (R.W.)

† These authors contributed equally to this work.

**Table S1** The targets interacting with silybinin.

| No. | Description                                               | Target Name |
|-----|-----------------------------------------------------------|-------------|
| 1   | Complement factor B                                       | CFAB        |
| 2   | cGMP-specific 3,5-cyclic phosphodiesterase                | PDE5A       |
| 3   | Estrogen receptor                                         | ESR1        |
| 4   | Methionine aminopeptidase 2                               | AMPM2       |
| 5   | Mitogen-activated protein kinase 8                        | MK08        |
| 6   | Stromelysin-1                                             | MMP3        |
| 7   | Glucosylceramidase                                        | GLCM        |
| 8   | Cholinesterase                                            | CHLE        |
| 9   | Mitogen-activated protein kinase 10                       | MAPK10      |
| 10  | Carbonic anhydrase 2                                      | CAH2        |
| 11  | Estrogen receptor beta                                    | ESR2        |
| 12  | Transthyretin                                             | TTR         |
| 13  | Proto-oncogene serine/threonine-protein kinase Pim-1      | PIM1        |
| 14  | Angiogenin                                                | ANGI        |
| 15  | U1 small nuclear ribonucleoprotein A                      | SNRPA       |
| 16  | Glutathione S-transferase P                               | GSTP1       |
| 17  | Tyrosine-protein phosphatase non-receptor type 1          | PTN1        |
| 18  | Peroxisome proliferator-activated receptor gamma          | PPARG       |
| 19  | Cathepsin D                                               | CATD        |
| 20  | Macrophage migration inhibitory factor                    | MIF         |
| 21  | Branched-chain-amino-acid aminotransferase, mitochondrial | BCAT2       |
| 22  | Cell division protein kinase 2                            | CDK2        |
| 23  | Serine/threonine-protein kinase Chk1                      | CHK1        |
| 24  | Mineralocorticoid receptor                                | MR          |
| 25  | Sex hormone-binding globulin                              | SHBG        |
| 26  | Leukotriene A-4 hydrolase                                 | LKHA4       |
| 27  | Progesterone receptor                                     | PRGR        |
| 28  | Early endosome antigen 1                                  | EEA1        |
| 29  | 3-phosphoinositide-dependent protein kinase 1             | PDPK1       |
| 30  | Cyclin-A2                                                 | CCNA2       |
| 31  | cAMP-specific 3,5-cyclic phosphodiesterase 4B             | PDE4B       |
| 32  | Glutamate carboxypeptidase 2                              | FOLH1       |
| 33  | Collagenase 3                                             | MMP13       |
| 34  | Phosphoserine phosphatase                                 | PSPH        |
| 35  | ADAM 17                                                   | ADA17       |
| 36  | Peroxisome proliferator-activated receptor delta          | PPARD       |
| 37  | Proto-oncogene tyrosine-protein kinase Src                | SRC         |
| 38  | Thymidylate synthase                                      | TYSY        |
| 39  | Mitogen-activated protein kinase 14                       | MAPK14      |
| 40  | Phospholipase A2, membrane associated                     | PLA2G2A     |

|    |                                                                 |         |
|----|-----------------------------------------------------------------|---------|
| 41 | Androgen receptor                                               | ANDR    |
| 42 | Carbonic anhydrase 1                                            | CA1     |
| 43 | Chitotriosidase-1                                               | CHIT1   |
| 44 | Cell division protein kinase 6                                  | CDK6    |
| 45 | Glutaredoxin-1                                                  | GLRX1   |
| 46 | Aldo-keto reductase family 1 member C1                          | AKR1C1  |
| 47 | Serum albumin                                                   | ALBU    |
| 48 | NAD-dependent malic enzyme, mitochondrial                       | MAOM    |
| 49 | Thyroid hormone receptor beta                                   | THRB    |
| 50 | cAMP-specific 3,5-cyclic phosphodiesterase 4D                   | PDE4D   |
| 51 | 3-hydroxy-3-methylglutaryl-coenzyme A reductase                 | HMDH    |
| 52 | Estradiol 17-beta-dehydrogenase 1                               | HSD17B1 |
| 53 | Casein kinase II subunit alpha                                  | CSNK2A1 |
| 54 | Alcohol dehydrogenase 1C                                        | ADH1C   |
| 55 | Chloride intracellular channel protein 1                        | CLIC1   |
| 56 | Urokinase-type plasminogen activator                            | UROK    |
| 57 | Heparin-binding growth factor 1                                 | FGF1    |
| 58 | Heat shock protein HSP 90-alpha                                 | HS90A   |
| 59 | Ornithine carbamoyltransferase, mitochondrial                   | OTC     |
| 60 | Lanosterol synthase                                             | ERG7    |
| 61 | Pyruvate dehydrogenase E1 component subunit beta, mitochondrial | PDHB    |
| 62 | Estrogen-related receptor gamma                                 | ERR3    |
| 63 | Glycogen synthase kinase-3 beta                                 | GSK3B   |
| 64 | Serine hydroxymethyltransferase, cytosolic                      | GLYC    |
| 65 | cGMP-inhibited 3,5-cyclic phosphodiesterase B                   | PDE3B   |
| 66 | Cathepsin K                                                     | CATK    |
| 67 | Corticosteroid 11-beta-dehydrogenase isozyme 1                  | DH11    |
| 68 | Interferon-stimulated gene 20 kDa protein                       | ISG20   |
| 69 | Ribosylidihydronicotinamide dehydrogenase [quinone]             | NQO2    |
| 70 | cAMP-dependent protein kinase catalytic subunit alpha           | PRKACA  |
| 71 | Phenylalanine-4-hydroxylase                                     | PH4H    |
| 72 | Lactoylglutathione lyase                                        | GLO1    |
| 73 | Carbonyl reductase [NADPH] 1                                    | CBR1    |
| 74 | B-Raf proto-oncogene serine/threonine-protein kinase            | BRAF1   |
| 75 | UDP-glucose 4-epimerase                                         | GALE    |
| 76 | Inosine-5-monophosphate dehydrogenase 2                         | IMDH2   |
| 77 | Glutathione S-transferase theta-2                               | GSTT2   |
| 78 | Coagulation factor X                                            | FA10    |
| 79 | L-lactate dehydrogenase B chain                                 | LDHB    |
| 80 | Heat shock cognate 71 kDa protein                               | HSPA8   |
| 81 | Superoxide dismutase [Mn], mitochondrial                        | SOD2    |
| 82 | Alcohol dehydrogenase class-3                                   | ADHX    |
| 83 | Cystathionine beta-synthase                                     | CBS     |

|     |                                                                      |         |
|-----|----------------------------------------------------------------------|---------|
| 84  | Phosphoenolpyruvate carboxykinase, cytosolic [GTP]                   | PCK1    |
| 85  | Aldose reductase                                                     | ALDR    |
| 86  | Uridine 5-monophosphate synthase                                     | UMPS    |
| 87  | Retinoic acid receptor RXR-alpha                                     | RXRA    |
| 88  | Caspase-3                                                            | CASP3   |
| 89  | Vascular endothelial growth factor receptor 2                        | VEGFR2  |
| 90  | Aldo-keto reductase family 1 member C3                               | AK1C3   |
| 91  | Ribonuclease 4                                                       | RNASE4  |
| 92  | Flavin reductase                                                     | BLVRB   |
| 93  | Epidermal growth factor receptor                                     | EGFR    |
| 94  | Bile salt sulfotransferase                                           | SULT2A1 |
| 95  | Peptidyl-prolyl cis-trans isomerase FKBP1A                           | FKB1A   |
| 96  | Coagulation factor VII                                               | F7      |
| 97  | ADP-ribosyl cyclase 2                                                | BST1    |
| 98  | Dipeptidyl peptidase 4                                               | DPP4    |
| 99  | Cytochrome P450 2C9                                                  | CYP2C9  |
| 100 | Triosephosphate isomerase                                            | TPI     |
| 101 | Peroxisome proliferator-activated receptor alpha                     | PPARA   |
| 102 | T-cell surface glycoprotein CD1a                                     | CD1A    |
| 103 | Catalase                                                             | CATA    |
| 104 | Hepatocyte growth factor receptor                                    | MET     |
| 105 | Serine/threonine-protein kinase 6                                    | AURKA   |
| 106 | Prostatic acid phosphatase                                           | PPAP    |
| 107 | Serine/threonine-protein kinase PAK 6                                | PAK6    |
| 108 | Disintegrin and metalloproteinase domain-containing protein 17       | ADAM17  |
| 109 | Thymidine kinase, cytosolic                                          | TK1     |
| 110 | Estrogen sulfotransferase                                            | ST1E1   |
| 111 | Glutathione reductase, mitochondrial                                 | GSR     |
| 112 | Eosinophil cationic protein                                          | RNASE3  |
| 113 | Protein-glutamine gamma-glutamyltransferase E                        | TGM3    |
| 114 | Adenosylhomocysteinase                                               | SAHH    |
| 115 | Histone deacetylase 8                                                | HDAC8   |
| 116 | Leukocyte elastase                                                   | ELNE    |
| 117 | L-serine dehydratase                                                 | SDSL    |
| 118 | NAD(P) transhydrogenase, mitochondrial                               | NNT     |
| 119 | Bactericidal permeability-increasing protein                         | BPI     |
| 120 | Receptor tyrosine-protein kinase erbB-4                              | ERBB4   |
| 121 | [Pyruvate dehydrogenase [lipoamide]] kinase isozyme 2, mitochondrial | PKD2    |
| 122 | Nicotinamide mononucleotide adenylyltransferase 1                    | NMNAT1  |
| 123 | Oxysterols receptor LXR-beta                                         | NR1H2   |
| 124 | Dihydrofolate reductase                                              | DYR     |
| 125 | Fructose-bisphosphate aldolase A                                     | ALDOA   |

|     |                                                                      |         |
|-----|----------------------------------------------------------------------|---------|
| 126 | Uridine-cytidine kinase 2                                            | UCK2    |
| 127 | Fatty acid-binding protein, adipocyte                                | FABP4   |
| 128 | Galactosylgalactosylxylosylprotein 3-beta-glucuronosyltransferase 1  | B3GA1   |
| 129 | Arylsulfatase A                                                      | ARSA    |
| 130 | Insulin receptor                                                     | INSR    |
| 131 | Angiotensin-converting enzyme                                        | ACE     |
| 132 | Dihydroorotate dehydrogenase, mitochondrial                          | PYRD    |
| 133 | Proactivator polypeptide                                             | PSAP    |
| 134 | Pleckstrin homology domain-containing family A member 4              | PLEKHA4 |
| 135 | Fatty acid-binding protein, heart                                    | FABPH   |
| 136 | Trafficking protein particle complex subunit 3                       | TRAPPC3 |
| 137 | Bile acid receptor                                                   | NR1H4   |
| 138 | Gastrotropin                                                         | FABP6   |
| 139 | Pyruvate kinase isozymes R/L                                         | KPYR    |
| 140 | Hydroxyacylglutathione hydrolase, mitochondrial                      | HAGH    |
| 141 | Phosphatidylinositol transfer protein alpha isoform                  | PITPNA  |
| 142 | Tyrosine-protein kinase JAK2                                         | JAK2    |
| 143 | Hepatocyte growth factor                                             | HGF     |
| 144 | Renin                                                                | RENI    |
| 145 | Fatty acid-binding protein, brain                                    | FABP7   |
| 146 | Proto-oncogene tyrosine-protein kinase LCK                           | LCK     |
| 147 | Bifunctional 3-phosphoadenosine 5-phosphosulfate synthetase 1        | PAPSS1  |
| 148 | Glucose-6-phosphate isomerase                                        | G6PI    |
| 149 | Baculoviral IAP repeat-containing protein 4                          | XIAP    |
| 150 | Sulfotransferase family cytosolic 2B member 1                        | SULT2B1 |
| 151 | Bifunctional purine biosynthesis protein PURH                        | PUR9    |
| 152 | Dual specificity protein kinase CLK1                                 | CLK1    |
| 153 | Glutathione-requiring prostaglandin D synthase                       | PTGD2   |
| 154 | Deoxycytidine kinase                                                 | DCK     |
| 155 | Nuclear receptor subfamily 1 group I member 2                        | NR1I2   |
| 156 | Endoplasmic reticulum mannosyl-oligosaccharide 1,2-alpha-mannosidase | MAN1B1  |
| 157 | Nicotinamide mononucleotide adenylyltransferase 3                    | NMNAT3  |
| 158 | Ornithine aminotransferase, mitochondrial                            | OAT     |
| 159 | S-methyl-5-thioadenosine phosphorylase                               | MTAP    |
| 160 | RAC-beta serine/threonine-protein kinase                             | AKT2    |
| 161 | Hepatocyte nuclear factor 4-gamma                                    | HNF4G   |
| 162 | Matrix metalloproteinase-9                                           | MMP9    |
| 163 | Tyrosine-protein kinase HCK                                          | HCK     |
| 164 | Complement C1s subcomponent                                          | C1S     |
| 165 | Cellular retinoic acid-binding protein 2                             | CRABP2  |
| 166 | Aldo-keto reductase family 1 member C2                               | AK1C2   |
| 167 | Nitric oxide synthase, inducible                                     | NOS2    |
| 168 | Tyrosine-protein kinase ITK/TSK                                      | ITK     |

|     |                                                                  |        |
|-----|------------------------------------------------------------------|--------|
| 169 | Glycogen phosphorylase, liver form                               | PYGL   |
| 170 | Basic fibroblast growth factor receptor 1                        | FGFR1  |
| 171 | Interleukin-2                                                    | IL2    |
| 172 | C-C motif chemokine 5                                            | CCL5   |
| 173 | Glutathione S-transferase A1                                     | GSTA1  |
| 174 | Tyrosine-protein kinase JAK3                                     | JAK3   |
| 175 | Serine--pyruvate aminotransferase                                | SPYA   |
| 176 | 5(3)-deoxyribonucleotidase, mitochondrial                        | NT5M   |
| 177 | Dipeptidase 1                                                    | DPEP1  |
| 178 | Nepilysin                                                        | NEP    |
| 179 | Platelet glycoprotein Ib alpha chain                             | GP1BA  |
| 180 | Thymidylate kinase                                               | KTHY   |
| 181 | Beta-secretase 1                                                 | BACE1  |
| 182 | ADP-ribosylation factor 4                                        | ARF4   |
| 183 | Glucocorticoid receptor                                          | GCR    |
| 184 | Glutathione S-transferase A3                                     | GSTA3  |
| 185 | Angiopoietin-1 receptor                                          | TIE2   |
| 186 | Betaine--homocysteine S-methyltransferase 1                      | BHMT   |
| 187 | Ferrochelatase, mitochondrial                                    | FECH   |
| 188 | Neutrophil collagenase                                           | MMP8   |
| 189 | Glutathione S-transferase Mu 1                                   | GSTM1  |
| 190 | Serine/threonine-protein phosphatase PP1-gamma catalytic subunit | PPP1CC |
| 191 | Coagulation factor XI                                            | FA11   |
| 192 | Hydroxyacyl-coenzyme A dehydrogenase, mitochondrial              | HADH   |
| 193 | Acetyl-CoA acetyltransferase, mitochondrial                      | ACAT1  |
| 194 | Chymase                                                          | CMA1   |
| 195 | Vitamin D3 receptor                                              | VDR    |
| 196 | Adenosine kinase                                                 | ADK    |
| 197 | Cathepsin F                                                      | CTSF   |
| 198 | Cathepsin S                                                      | CATS   |
| 199 | Cell division protein kinase 7                                   | CDK7   |
| 200 | Farnesyl pyrophosphate synthetase                                | FPPS   |
| 201 | Phosphopantothenoylecysteine decarboxylase                       | PPCDC  |
| 202 | CD209 antigen                                                    | CD209  |
| 203 | Heat shock 70 kDa protein 1                                      | HSPA1  |
| 204 | Retinoic acid receptor alpha                                     | RARA   |
| 205 | Macrophage metalloelastase                                       | MMP12  |
| 206 | TGF-beta receptor type-1                                         | TGFR1  |
| 207 | Histo-blood group ABO system transferase                         | ABO    |
| 208 | Peptidyl-prolyl cis-trans isomerase FKBP1B                       | FKB1B  |
| 209 | GTP-binding protein Rheb                                         | RHEB   |
| 210 | Lysozyme C                                                       | LYZ    |
| 211 | Cell division control protein 42 homolog                         | CDC42  |

|     |                                                                 |          |
|-----|-----------------------------------------------------------------|----------|
| 212 | Glutathione S-transferase omega-1                               | GSTO1    |
| 213 | Retinoic acid receptor beta                                     | RARB     |
| 214 | Neutrophil gelatinase-associated lipocalin                      | NGAL     |
| 215 | Signal transducer and activator of transcription 1-alpha/beta   | STAT1    |
| 216 | Growth factor receptor-bound protein 2                          | GRB2     |
| 217 | Eukaryotic translation initiation factor 4E                     | EIF4E    |
| 218 | MAP kinase-activated protein kinase 2                           | MAPKAPK2 |
| 219 | Transforming growth factor beta-2                               | TGFB2    |
| 220 | Non-secretory ribonuclease                                      | RNASE2   |
| 221 | Bifunctional heparan sulfate N-deacetylase/N-sulfotransferase 1 | NDST1    |
| 222 | E-selectin                                                      | LYAM2    |
| 223 | Ras-related protein Rab-5A                                      | RAB5A    |
| 224 | Rho-related GTP-binding protein RhoE                            | RND3     |
| 225 | GTPase HRas                                                     | RASH     |
| 226 | Phosphatidylinositol 3-kinase regulatory subunit alpha          | P85A     |
| 227 | Glutathione S-transferase Mu 2                                  | GSTM2    |
| 228 | Mast/stem cell growth factor receptor                           | KIT      |
| 229 | Tryptophanyl-tRNA synthetase, cytoplasmic                       | trpS     |
| 230 | Mitogen-activated protein kinase 12                             | MK12     |
| 231 | Dual specificity mitogen-activated protein kinase kinase 1      | MP2K1    |
| 232 | PMS1 protein homolog 2                                          | PMS2     |
| 233 | RAF proto-oncogene serine/threonine-protein kinase              | RAF1     |
| 234 | Heme oxygenase 1                                                | HMOX1    |
| 235 | Histidine triad nucleotide-binding protein 1                    | HINT1    |
| 236 | Inositol-trisphosphate 3-kinase A                               | ITPKA    |
| 237 | ADP-ribosylation factor-like protein 5A                         | ARL5A    |
| 238 | Tyrosine-protein kinase ZAP-70                                  | ZAP70    |
| 239 | Glucose-6-phosphate 1-dehydrogenase                             | G6PD     |
| 240 | Ras-related protein Rab-11A                                     | RB11A    |
| 241 | Ras-related protein Rab-9                                       | RAB9     |
| 242 | Death-associated protein kinase 1                               | DAPK1    |
| 243 | Apoptotic protease-activating factor 1                          | APAF     |
| 244 | Riboflavin kinase                                               | RFK      |
| 245 | Protein kinase C theta type                                     | KPCT     |
| 246 | ADP-ribosylation factor-like protein 5B                         | ARL5B    |
| 247 | Scavenger mRNA-decapping enzyme DcpS                            | DCPS     |
| 248 | Phenylethanolamine N-methyltransferase                          | PNMT     |
| 249 | Retinoic acid receptor RXR-beta                                 | RXRB     |
| 250 | Histamine N-methyltransferase                                   | HNMT     |
| 251 | L-xylulose reductase                                            | DCXR     |
| 252 | Baculoviral IAP repeat-containing protein 7                     | BIRC7    |
| 253 | Spliceosome RNA helicase BAT1                                   | BAT1     |
| 254 | ADAM 33                                                         | ADA33    |

|     |                                                                |         |
|-----|----------------------------------------------------------------|---------|
| 255 | Histone-lysine N-methyltransferase, H3 lysine-79 specific      | HLNM    |
| 256 | Nucleoside diphosphate kinase B                                | NDKB    |
| 257 | Tryptase beta-2                                                | TRYB2   |
| 258 | 6-phosphofructo-2-kinase/fructose-2,6-biphosphatase 1          | PFKFB1  |
| 259 | Kinesin-like protein KIF11                                     | KIF11   |
| 260 | tRNA (cytosine-5-)-methyltransferase                           | O14717  |
| 261 | Quinone oxidoreductase                                         | QOR     |
| 262 | Antigen peptide transporter 1                                  | TAP1    |
| 263 | S-adenosylmethionine decarboxylase proenzyme                   | DCAM    |
| 264 | Deoxyuridine 5-triphosphate nucleotidohydrolase, mitochondrial | DUT     |
| 265 | Hypoxanthine-guanine phosphoribosyltransferase                 | HPRT1   |
| 266 | Sulfotransferase 1A1                                           | ST1A1   |
| 267 | RAC-alpha serine/threonine-protein kinase                      | AKT1    |
| 268 | Tyrosine-protein kinase BTK                                    | BTK     |
| 269 | GMP reductase 1                                                | GMPR1   |
| 270 | Caspase-1                                                      | CASP1   |
| 271 | Fibrinogen gamma chain                                         | FIBG    |
| 272 | Maleylacetoacetate isomerase                                   | GSTZ1   |
| 273 | GTP-binding nuclear protein Ran                                | RAN     |
| 274 | Interstitial collagenase                                       | MMP1    |
| 275 | UDP-N-acetylhexosamine pyrophosphorylase                       | UAP1    |
| 276 | Histone acetyltransferase PCAF                                 | KAT2B   |
| 277 | Adenylate kinase isoenzyme 1                                   | AK1     |
| 278 | Ras-related C3 botulinum toxin substrate 1                     | RAC1    |
| 279 | FK506-binding protein 3                                        | FKBP3   |
| 280 | GMP reductase 2                                                | GMPR    |
| 281 | Ras-related protein Rap-2a                                     | RAP2A   |
| 282 | Isovaleryl-CoA dehydrogenase, mitochondrial                    | IVD     |
| 283 | Nuclear receptor ROR-alpha                                     | RORA    |
| 284 | Phosphatidylcholine transfer protein                           | PCTP    |
| 285 | Amine oxidase [flavin-containing] B                            | AOFB    |
| 286 | Pancreatic alpha-amylase                                       | AMYP    |
| 287 | NAD-dependent deacetylase sirtuin-5                            | SIRT5   |
| 288 | Sepiapterin reductase                                          | SPR     |
| 289 | Carbonic anhydrase 3                                           | CA3     |
| 290 | Carbonic anhydrase 5B, mitochondrial                           | CA5B    |
| 291 | Carbonic anhydrase 13                                          | CA13    |
| 292 | Carbonic anhydrase 6                                           | CA6     |
| 293 | Carbonic anhydrase 7                                           | CA7     |
| 294 | Carbonic anhydrase 4                                           | CA4     |
| 295 | Carbonic anhydrase 2                                           | CA2     |
| 296 | Carbonic anhydrase 5A, mitochondrial                           | CA5A    |
| 297 | Taste receptor type 2 member 31                                | TAS2R31 |



|     |                                                                      |         |
|-----|----------------------------------------------------------------------|---------|
| 298 | Acyl carrier protein, mitochondrial                                  | NDUFAB1 |
| 299 | Complex I intermediate-associated protein 30, mitochondrial          | NDUFAF1 |
| 300 | NADH dehydrogenase [ubiquinone] 1 alpha subcomplex subunit 1         | NDUFA1  |
| 301 | NADH dehydrogenase [ubiquinone] 1 alpha subcomplex subunit 2         | NDUFA2  |
| 302 | NADH dehydrogenase [ubiquinone] 1 alpha subcomplex subunit 3         | NDUFA3  |
| 303 | NADH dehydrogenase [ubiquinone] 1 alpha subcomplex subunit 4         | NDUFA4  |
| 304 | NADH dehydrogenase [ubiquinone] 1 alpha subcomplex subunit 5         | NDUFA5  |
| 305 | NADH dehydrogenase [ubiquinone] 1 alpha subcomplex subunit 6         | NDUFA6  |
| 306 | NADH dehydrogenase [ubiquinone] 1 alpha subcomplex subunit 7         | NDUFA7  |
| 307 | NADH dehydrogenase [ubiquinone] 1 alpha subcomplex subunit 8         | NDUFA8  |
| 308 | NADH dehydrogenase [ubiquinone] 1 alpha subcomplex subunit 9         | NDUFA9  |
| 309 | NADH dehydrogenase [ubiquinone] 1 alpha subcomplex subunit 10        | NDUFA10 |
| 310 | NADH dehydrogenase [ubiquinone] 1 alpha subcomplex subunit 11        | NDUFA11 |
| 311 | NADH dehydrogenase [ubiquinone] 1 alpha subcomplex subunit 12        | NDUFA12 |
| 312 | NADH dehydrogenase [ubiquinone] 1 alpha subcomplex subunit 13        | NDUFA13 |
| 313 | NADH dehydrogenase [ubiquinone] 1 beta subcomplex subunit 1          | NDUFB1  |
| 314 | NADH dehydrogenase [ubiquinone] 1 beta subcomplex subunit 2          | NDUFB2  |
| 315 | NADH dehydrogenase [ubiquinone] 1 beta subcomplex subunit 3          | NDUFB3  |
| 316 | NADH dehydrogenase [ubiquinone] 1 beta subcomplex subunit 4          | NDUFB4  |
| 317 | NADH dehydrogenase [ubiquinone] 1 beta subcomplex subunit 5          | NDUFB5  |
| 318 | NADH dehydrogenase [ubiquinone] 1 beta subcomplex subunit 6          | NDUFB6  |
| 319 | NADH dehydrogenase [ubiquinone] 1 beta subcomplex subunit 7          | NDUFB7  |
| 320 | NADH dehydrogenase [ubiquinone] 1 beta subcomplex subunit 8          | NDUFB8  |
| 321 | NADH dehydrogenase [ubiquinone] 1 beta subcomplex subunit 9          | NDUFB9  |
| 322 | NADH dehydrogenase [ubiquinone] 1 beta subcomplex subunit 10         | NDUFB10 |
| 323 | NADH dehydrogenase [ubiquinone] 1 beta subcomplex subunit 11         | NDUFB11 |
| 324 | NADH dehydrogenase [ubiquinone] 1 subunit C1, mitochondrial          | NDUFC1  |
| 325 | NADH dehydrogenase [ubiquinone] 1 subunit C2                         | NDUFC2  |
| 327 | NADH dehydrogenase [ubiquinone] 1 alpha subcomplex assembly factor 3 | NDUFAF3 |
| 328 | NADH dehydrogenase [ubiquinone] 1 alpha subcomplex assembly factor 4 | NDUFAF4 |
| 329 | NADH-ubiquinone oxidoreductase 75 kDa subunit, mitochondrial         | NDUFS1  |
| 330 | NADH dehydrogenase [ubiquinone] iron-sulfur protein 2, mitochondrial | NDUFS2  |
| 331 | NADH dehydrogenase [ubiquinone] iron-sulfur protein 3, mitochondrial | NDUFS3  |
| 332 | NADH dehydrogenase [ubiquinone] iron-sulfur protein 4, mitochondrial | NDUFS4  |
| 333 | NADH dehydrogenase [ubiquinone] iron-sulfur protein 5                | NDUFS5  |
| 334 | NADH dehydrogenase [ubiquinone] iron-sulfur protein 6, mitochondrial | NDUFS6  |
| 335 | NADH dehydrogenase [ubiquinone] iron-sulfur protein 7, mitochondrial | NDUFS7  |
| 336 | NADH dehydrogenase [ubiquinone] iron-sulfur protein 8, mitochondrial | NDUFS8  |
| 337 | NADH dehydrogenase [ubiquinone] flavoprotein 1, mitochondrial        | NDUFV1  |
| 338 | NADH dehydrogenase [ubiquinone] flavoprotein 2, mitochondrial        | NDUFV2  |
| 339 | NADH dehydrogenase [ubiquinone] flavoprotein 3, mitochondrial        | NDUFV3  |
| 340 | NADH-ubiquinone oxidoreductase chain 1                               | MT-ND1  |
| 341 | NADH-ubiquinone oxidoreductase chain 2                               | MT-ND2  |

|     |                                                                     |          |
|-----|---------------------------------------------------------------------|----------|
| 342 | NADH-ubiquinone oxidoreductase chain 3                              | MT-ND3   |
| 343 | NADH-ubiquinone oxidoreductase chain 4L                             | MT-ND4L  |
| 344 | NADH-ubiquinone oxidoreductase chain 5                              | MT-ND5   |
| 345 | NADH-ubiquinone oxidoreductase chain 6                              | MT-ND6   |
| 346 | NADH dehydrogenase [ubiquinone] 1 alpha subcomplex subunit 4-like 2 | NDUFA4L2 |
| 347 | 6-phosphogluconate dehydrogenase, decarboxylating                   | PGD      |
